# Supplementary material for: Providing School Meals to All Students Free of Charge during the COVID-19 Pandemic and Beyond: Challenges and Benefits Reported by School Foodservice Professionals in California
Source: MDPI journal article supplement (doi:10.3390/nu14183855), 2022-09-17
Supplement: s1 [file s1]

**Supplementary Table S1.** Percent of changes reported while implementing universal school meals in SY2021-22 by California school food authorities (n=360 to 359 depending on missingness of responses; excluded SFAs implementing universal school meals to all schools through CEP or another provision).

| Change                                                                     | Decreased Greatly | Decreased Slightly | No Effect | Increased Slightly | Increased Greatly | n   |
|----------------------------------------------------------------------------|-------------------|--------------------|-----------|--------------------|-------------------|-----|
| Student meal participation                                                 | 1.9               | 7.5                | 11.4      | 33.3               | 45.8              | 360 |
| Paperwork/administrative burden                                            | 9.9               | 18.9               | 26.8      | 27                 | 17.5              | 355 |
| Time in line for students to get meals                                     | 7.8               | 7.8                | 34.2      | 31.7               | 18.6              | 360 |
| Crowding in student dining areas                                           | 6.7               | 2.2                | 49        | 25.1               | 17                | 359 |
| Stigma for students from families with low income                          | 21                | 18.7               | 51.3      | 2.2                | 0.8               | 359 |
| Ease in collecting Meal Application/Alternative Income Forms from families | 19.5              | 12                 | 28.1      | 19.2               | 21.2              | 359 |
| Unpaid meal charges/debt                                                   | 62.8              | 3.6                | 27.8      | 2.8                | 3.1               | 360 |
| School food waste                                                          | 1.7               | 12                 | 29.5      | 38.2               | 18.7              | 359 |
| School meal packaging/solid waste                                          | 0.9               | 5.4                | 26.4      | 37.7               | 29.8              | 353 |
| Foodservice staffing challenges                                            | 1.1               | 1.4                | 20.6      | 29.2               | 47.8              | 360 |
| Scratch/modified scratch cooking                                           | 11.4              | 13.3               | 51.3      | 15                 | 9.1               | 361 |
| Use of general funds to support school meal programs                       | 12.6              | 8.9                | 49.4      | 20.1               | 8.7               | 358 |

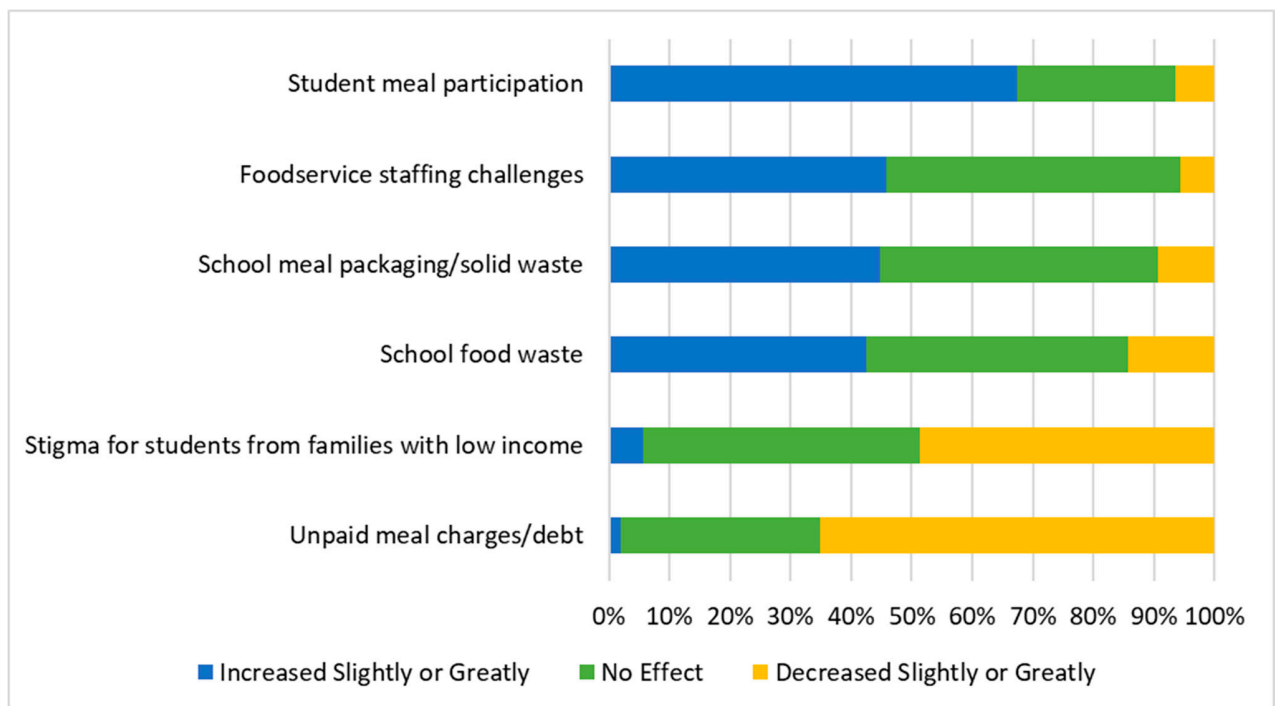

**Supplementary Figure S1.** Benefits and challenges of USM among SFAs that provided universal school meals before SY2021-22 district-wide (n=106-107 depending on missingness of responses).

**Supplementary Table S2.** Percent of challenges implementing universal school meals during the COVID-19 pandemic in SY2021-22 by California school food authorities.

| Challenge                                                                               | Significant Challenge | Moderate Challenge | Minimal Challenge | Not a Challenge | n   |
|-----------------------------------------------------------------------------------------|-----------------------|--------------------|-------------------|-----------------|-----|
| Costs/financial sustainability of school meal programs                                  | 45.6                  | 36.1               | 11.8              | 6.6             | 577 |
| Procuring or receiving the types of foods or beverages planned                          | 64.9                  | 24                 | 7.5               | 3.7             | 576 |
| Procuring or receiving the quantities of foods or beverages planned                     | 62.6                  | 23.3               | 9.2               | 4.9             | 575 |
| Procuring or receiving non-food supplies or equipment needed for school meals           | 62.8                  | 19.8               | 11.1              | 6.3             | 575 |
| Meeting federal meal pattern requirements                                               | 19.1                  | 37.2               | 30.6              | 13.2            | 576 |
| Meeting student cultural food preferences                                               | 12.4                  | 27.4               | 38.1              | 22.2            | 573 |
| Meeting meal modifications for children with medically-related food and nutrition needs | 11.8                  | 21.7               | 34.8              | 31.7            | 575 |
| Adequacy of kitchen equipment                                                           | 21.4                  | 30.1               | 26.4              | 22.1            | 575 |
| Adequacy of school nutrition services staffing                                          | 46.4                  | 26.2               | 14.4              | 13              | 576 |
| Meal service modifications or disruptions                                               | 30.1                  | 32.9               | 25                | 12              | 575 |
| Increased meal program participation                                                    | 20.2                  | 28.4               | 26.3              | 25.1            | 574 |
| Reduced meal program participation                                                      | 17.6                  | 20.4               | 22.1              | 39.9            | 574 |
| Negative feedback or complaints about school meals from parents or students             | 9.1                   | 17.3               | 39.4              | 34.2            | 573 |

**Supplementary Table S3.** Percent of SFAs that reported that the current meal reimbursement is sufficient to cover the full cost of producing school meals by select characteristics of California school food authorities.

| Meal Type <sup>1</sup> | FRPM Eligibility <sup>2</sup> |                 |         | Urbanicity <sup>3</sup> |                 |                 | Size <sup>4</sup> |      |                 |                 |
|------------------------|-------------------------------|-----------------|---------|-------------------------|-----------------|-----------------|-------------------|------|-----------------|-----------------|
|                        | ≤40%<br>(n=145)               | >40%<br>(n=215) | p-value |                         | ≤40%<br>(n=145) | >40%<br>(n=215) | p-value           |      | ≤40%<br>(n=145) | >40%<br>(n=215) |
|                        | %                             |                 |         | %                       |                 | %               |                   |      |                 |                 |
| Breakfast (n=572)      | 33.6                          | 44.1            | 0.07    | 40.2                    | 43.7            | 0.54            | 40.5              | 48.8 | 36.8            | 0.34            |
| Lunch (n=574)          | 30.1                          | 43.1            | 0.02    | 37.5                    | 43.2            | 0.31            | 38.7              | 48.0 | 34.3            | 0.23            |

1. Frequencies represent SFAs that identified the concern as moderate or serious; other answer options were: mild concern and not a concern.
2. Free and reduced-price meal (FRPM) eligibility was defined as SFAs with 40% or less FRPM students vs. SFAs with more than 40% FRPM in SY2021-22. Models for FRPM eligibility were adjusted by CEP status. Adjusted percentages and p-values were reported.
3. Urbanicity was defined using the USDA rural-urban commuting area (RUCA) codes as urban areas=RUCA primary code 1 and non-urban areas=RUCA primary codes 2-10. Models for urbanicity were adjusted by CEP status and size. Adjusted percentages and p-values were reported.
4. SFA size was defined as small=2,499 or less students, medium=2,500 to 9,999 students, and large=10,000 or more students. Models for size were adjusted by CEP status and p-values represent the overall effect of size. Adjusted percentages and p-values were reported.

**Supplementary Table S4.** Factors reported driving the foodservice deficit for California school food authorities during the COVID-19 pandemic in SY2021-22.

| Factors driving the deficit for your SFA in SY2021-22 | n   | %    |
|-------------------------------------------------------|-----|------|
| Food costs                                            | 234 | 86.4 |
| School nutrition services labor costs                 | 218 | 80.4 |
| Supply costs                                          | 192 | 70.9 |
| Indirect costs                                        | 126 | 46.5 |
| Equipment costs                                       | 122 | 45.0 |
| Decreased meal program participation                  | 87  | 32.1 |
| Transportation costs                                  | 79  | 29.2 |
| Facility costs                                        | 54  | 19.9 |
| Storage costs                                         | 47  | 17.3 |
| Increased meal program participation                  | 39  | 14.4 |
| Other                                                 | 15  | 5.5  |
| Don't know / not sure                                 | 7   | 2.6  |

**Supplementary Table S5.** Percent of concerns about implementing universal school meals in SY2022-23 for California school food authorities.

| Concern                                                       | Not a Concern | Mild Concern | Moderate Concern | Serious Concern | n   |
|---------------------------------------------------------------|---------------|--------------|------------------|-----------------|-----|
| Costs/financial sustainability of school meal programs        | 17.6          | 25.7         | 28.5             | 28.2            | 575 |
| Loss of revenue from paid meals                               | 47.6          | 22.7         | 16.2             | 13.5            | 576 |
| Loss of revenue from competitive food and beverage sales      | 62.2          | 16.9         | 13.6             | 7.3             | 574 |
| Inadequate product or ingredient availability                 | 12.5          | 25           | 26               | 36.4            | 576 |
| Difficulty sourcing locally-grown or produced items           | 19.3          | 32.4         | 27.4             | 20.9            | 574 |
| Challenges in meeting federal school meal nutrition standards | 27.3          | 28.5         | 26.6             | 17.6            | 575 |
| Challenges in maintaining meal quality and variety            | 21            | 29.9         | 27               | 22.1            | 576 |
| Staffing shortages                                            | 11.8          | 19.3         | 22.6             | 46.4            | 576 |
| Lack of adequate time for staff training                      | 20.8          | 26.6         | 26.2             | 26.4            | 576 |
| Inadequate kitchen equipment                                  | 24.7          | 24.5         | 30               | 20.8            | 576 |
| Inadequate kitchen facility and/or storage space              | 20.2          | 22.1         | 26.1             | 31.5            | 574 |
| Increases in per student school meal food waste               | 18.1          | 33.6         | 27               | 21.4            | 575 |
| Increases in per student school meal packaging/solid waste    | 19.7          | 31           | 28.2             | 21.2            | 575 |
| Low breakfast participation                                   | 34.2          | 29.9         | 19.6             | 16.3            | 576 |
| High breakfast participation                                  | 55.5          | 23.1         | 14.3             | 7.1             | 575 |
| Low lunch participation                                       | 39.2          | 28.7         | 18.6             | 13.5            | 576 |
| High lunch participation                                      | 51.4          | 22.6         | 16.2             | 9.9             | 576 |

**Supplementary Table S6.** Percent of additional resources or information needed by California school food authorities to implement universal school meals in SY2022-23.

| Resources                                            | Not Needed | Needed a Little | Needed a Lot | n   |
|------------------------------------------------------|------------|-----------------|--------------|-----|
| Financial management                                 | 38.5       | 42.3            | 19.2         | 572 |
| Additional facilities and/or equipment               | 16.2       | 41.8            | 42           | 576 |
| Menu planning, meal counting and claiming            | 47.8       | 37.6            | 14.6         | 577 |
| Cultural diversity in meal planning                  | 49.6       | 42.4            | 8.0          | 573 |
| Meeting special dietary needs                        | 53.4       | 37.5            | 9.1          | 573 |
| Food safety                                          | 62.5       | 31.9            | 5.6          | 571 |
| Communications and marketing to students and parents | 23.9       | 49.1            | 27           | 574 |
| Making school meals more appealing to students       | 28.4       | 46.3            | 25.4         | 575 |
| Increasing school meal participation                 | 28.6       | 42.7            | 28.8         | 574 |
| Other                                                | 69.1       | 7.3             | 23.6         | 110 |
